1 **Serum-mediated cleavage of *Bacillus anthracis* Protective Antigen is a two-step**  
2 **process that involves a serum carboxypeptidase**

3  
4  
5

6 David L. Goldman<sup>1,2\*</sup>, Edward Nieves<sup>3</sup>, Antonio Nakouzi<sup>1</sup>, Johanna Rivera<sup>1</sup>, Ei Ei Phyu<sup>2</sup>,

7 Than Htut Win<sup>2</sup>, Jacqueline Achkar<sup>1</sup> and Arturo Casadevall<sup>1,4</sup>

8  
9

10

11 Departments of <sup>1</sup>Microbiology and Immunology, <sup>2</sup>Pediatrics, <sup>3</sup>Biochemistry, at the Albert  
12 Einstein College of Medicine, Bronx, New York and the Children's Hospital at Montefiore.

13

14 <sup>4</sup>Present address: Department of Microbiology and Immunology, Johns Hopkins School of  
15 Medicine, Baltimore, Maryland.

16

17 Key words: anthrax, lethal toxin, innate immunity, serum, protease

18

19

20

21 \*Address all Correspondence to:

22 David L. Goldman

23 1300 Morris Park Ave

24 Bronx, NY 10461

25 Telephone: 718-741-2470

26 **Abstract.**

27 Much our understanding of the activity of anthrax toxin is based on *in-vitro* systems, which  
28 delineate the interaction between *B. anthracis* toxins and the cell surface. These systems  
29 however, fail to account for the intimate association of *B. anthracis* with the circulatory  
30 system, including the contribution of serum proteins to the host response and processing of  
31 anthrax toxins. Using variety immunologic techniques to inhibit serum processing of *B.*  
32 *anthracis* Protective Antigen (PA) along with mass spectrometry analysis, we demonstrate  
33 that serum digests PA via 2 distinct reactions. In the first reaction, serum cleaves PA<sub>83</sub> into 2  
34 fragments to produce PA<sub>63</sub> and PA<sub>20</sub> fragments, similar to that observed following furin  
35 digestion. This is followed by carboxypeptidase-mediated removal of the carboxy-terminal  
36 arginine and lysine residues from PA<sub>20</sub>.

37

38 **Importance.**

39 Our findings identify a serum-mediated modification of PA<sub>20</sub> that has not been previously  
40 described. These observations further imply that the processing of PA is more complex than  
41 currently thought. Additional study is needed to define the contribution of serum processing  
42 of PA to the host response and individual susceptibility to anthrax.

43

44

45

46

47

48

## 49 INTRODUCTION

50

51 *Bacillus anthracis* is the causative agent of anthrax and is widely recognized for its potential  
52 use as an agent of bioterrorism. *B. anthracis* secretes 2 bipartite toxins, lethal and edema  
53 toxins that are essential for virulence. Both toxins require the protective antigen (PA)  
54 component to mediate cell entry. PA is, therefore, essential to the damaging effects of anthrax  
55 toxins and PA-deficient mutants have significantly reduced virulence (1).

56

57 The current paradigm of toxin pathogenesis posits that *B. anthracis* secretes the pro-form of  
58 PA (PA<sub>83</sub>), which binds to cell surface receptors (tumor endothelium marker-8 or capillary  
59 morphogenesis protein -2 where it undergoes cleavage by cell-associated furin into 2  
60 fragments, PA<sub>20</sub> and PA<sub>63</sub>. PA<sub>63</sub> subsequently undergoes heptamerization to form a pre-pore  
61 structure that binds edema factor (EF) or lethal factor (LF) and is internalized.  
62 Understanding the mechanism by which anthrax toxin is processed is important because  
63 interference with the processing steps is the basis for the development of therapeutics  
64 including furin inhibitors (2). In addition, antibodies reactive to PA are protective in animal  
65 models of anthrax and one monoclonal antibody, Raxibacumab, has been licensed for clinical  
66 use (3-5).

67

68 Much of our understanding about toxin processing in anthrax pathogenesis is based on  
69 experiments using in-vitro systems (Reviewed in (6)). These systems generally do not take  
70 into account the role of host serum proteins as part of the host response to anthrax. During  
71 the course of anthrax, *B. anthracis* encounters serum proteins at multiple stages including

72 invasion into the lymphatic system and high-level bacteremia, which occurs in the context of  
73 sepsis. In late stages of experimental anthrax in macaques, for example, lethal toxin  
74 concentrations on the order of 10 µg/ ml have been reported (7). The intimate association  
75 between *B. anthracis* and serum is further highlighted by the presence of pathogen-  
76 associated proteins that directly act on elements within circulation. This includes enzymes  
77 that digest host hemoglobin and circulating lethal toxin, which interferes with neutrophil  
78 function. (8, 9).

79  
80 Several lines of evidence suggest more complexity to PA processing that is apparent from the  
81 current model. Anthrax toxin is released from *B. anthracis* in vesicles that contain all toxin  
82 components (10). Although these vesicles may be rapidly disrupted by serum albumin  
83 releasing toxin components (11), they are also released intracellularly. In addition, PA  
84 **circulating in the serum** is found in animal models as a complex of PA<sub>63</sub> bound to LF or EF,  
85 not as intact PA<sub>83</sub> (12). In fact, serum from humans and other species has proteolytic activity  
86 that digests PA in a manner similar to furin (13-15). Our previous studies suggest a  
87 correlation between, serum-mediated digestion of PA and protection from the killing effects  
88 of Lethal Toxin *in vitro* (15). In the current work, we find that serum-mediated processing  
89 of PA is a 2-step reaction that involves carboxypeptidase-mediated truncation of the PA<sub>20</sub>  
90 fragment.

91

## 92 **RESULTS**

93

94 **Serum-mediated digestion of rPA.** Serum treatment of rPA<sub>83</sub> produced 2 protein  
95 fragments, PA<sub>63</sub> and a band that is slightly lower in molecular mass than PA<sub>20</sub> (Figure 1; lane  
96 6). The larger protein is similar in size to the PA<sub>63</sub> produced by furin digestion of rPA<sub>83</sub>.  
97 However the smaller protein is smaller than the PA<sub>20</sub> produced by furin digestion of rPA<sub>83</sub>  
98 and is referred to as truncated PA<sub>20</sub>. Furthermore, serum treatment of rPA<sub>83</sub> before or after  
99 furin digestion still produced this truncated fragment (Figure 1, lanes 2 and 4). Heat  
100 inactivation of serum prevented this truncation (Figure 1; lanes 3 and 5), consistent with the  
101 idea that the enzyme responsible for truncation is heat labile.

102 **Inhibition of serum-mediated digestion of rPA.** To determine the precise site at which  
103 serum cleaves rPA, we attempted to inhibit serum -mediated cleavage using a library of  
104 overlapping peptides, which represent the PA sequence and antibodies that recognize  
105 various PA sites. Pre-incubation of rPA with the mAb 19D2, which recognizes an epitope  
106 immediately C-terminal of the furin site (16), prevented rPA digestion by serum and furin.  
107 This inhibition of digestion was not seen with other PA-specific antibodies, including 7.5 G,  
108 which recognizes domain 1 of PA<sub>83</sub>. Serum-mediated PA cleavage was also prevented by co-  
109 incubation of serum with 3 overlapping peptides (D5-D7), which contain the furin digestion  
110 site, but not with other peptides (including, D12, E1, E2, which represent PA sequences  
111 approximately 30 AA residues C terminal to the furin site) (not shown).

112  
113 Using chemical inhibitors while measuring PA<sub>63</sub> formation, we found that the  
114 serine/cysteine protease antipain partially inhibited the formation of PA<sub>63</sub>. In contrast, none  
115 of the other tested protease inhibitors, including bestatin, chymostatin, E-64, leupeptin,  
116 pepstatin, phosphoramidon, pepabloc SC and aprotinin prevented PA<sub>63</sub> formation. As in

117 previous studies, we found that EDTA was a potent inhibitor of serum mediated digestion of  
118 PA<sub>83</sub>. By contrast, both competitive inhibitors of furin (I and II) prevented serum mediated  
119 digestion of PA. For the furin inhibitor I, concentrations as low as 0.001 mg/ml resulted in  
120 complete inhibition of serum digestion, whereas for the furin inhibitor II concentrations as  
121 low as 0.010 mg/ml produced complete inhibition of digestion (Figure 2).

122  
123 **Truncated PA<sub>20</sub> fragment.** To better identify the precise site of serum-mediated digestion  
124 of rPA, the truncated PA<sub>20</sub> fragment produced by serum digestion was examined by mass  
125 spectrometry. First the intact protein mass of this fragment was measured and the  
126 experimental mass determined by LC-ESI MS to be 23,600 Da (Figure 1). Furin cleaves at  
127 RXK/RR, which would correspond to a predicted molecular mass of 25,157 Da for rPA  
128 (Figure 3; n-terminus to RKKR) a difference of 1,554 Da; way beyond the error of  
129 measurement. To determine the sequence of the truncated PA<sub>20</sub> fragment in-gel trypsin  
130 digestion was performed. The LC-MS/MS data identified the underlined tryptic peptides  
131 shown in Figure 3 (identified tryptic peptides of the are listed in supplemental table 1). The  
132 peptide sequence, LLNES...GFIK, is too large for fragmentation on the LTQ mass  
133 spectrometer and was not detected by MS/MS but the +4, +5, +6, +7 and +8 charge states  
134 were detected (Supplemental Figure 2). The predicted protein mass from the n-terminus to  
135 the last tryptic peptide identified is 23,213 Da and if the next 4 amino acids are included  
136 (SSNS) the predicted protein mass will increase to 23,588 Da, a difference of 12 Da or 0.05%  
137 when compared with the experimental intact protein mass (23,600 Da). These findings are  
138 consistent with serum-mediated cleavage of the basic, C-terminal arginine and lysine

139 residues from the PA<sub>20</sub> fragment produced by furin digestion followed by possibly  
140 carboxypeptidase.

141

142 **Carboxypeptidase treatment of rPA.** Given these results, we sought to determine whether  
143 this truncated PA<sub>20</sub> fragment could result from serum carboxypeptidase digestion of PA<sub>20</sub>.  
144 Carboxypeptidases are a family of enzymes that cleave residues from the C-terminal end of  
145 a protein. This includes a group of enzymes that cleave basic amino acid residues from the  
146 carboxy terminus. To determine if carboxypeptidase could produce a truncated PA<sub>20</sub>  
147 fragment, we conducted studies with a pancreatic carboxypeptidase. The effects of  
148 Carboxypeptidase B (CPB) treatment on furin-digested rPA were dose dependent. At higher  
149 concentrations (250 µg/ml; Figure 4 lane 5) multiple digestion fragments of PA were  
150 observed and PA<sub>20</sub> reactivity was completely lost. A similar pattern was seen in the absence  
151 of furin and presumably relates to the presence of contaminating trypsin in this pancreatic  
152 preparation. In contrast at lower concentrations of CPB (25 µg/ml; Figure 4 lane 4),  
153 treatment produced a truncated PA<sub>20</sub> fragment that was similar in size to that observed with  
154 serum digestion of PA (Figure 4, lane 1). Lower concentrations of CPB (2.5 µg/ml) had no  
155 effect on the size of furin-treated PA<sub>20</sub>, when compared with furin treatment alone.

156

157 **Inhibition of serum carboxypeptidase activity.** Next we sought to determine whether  
158 the ability of serum to produce a truncated PA<sub>20</sub> fragment could be inhibited by  
159 carboxypeptidase inhibitors. Both Guanidinoethylmercaptosuccinic acid (GEMSA) potato  
160 tuber extract (PTI) are potent competitive inhibitors of carboxypeptidase though their  
161 inhibitory activity is not specific to any one class of carboxypeptidases. Addition of GEMSA,

162 (500  $\mu\text{g}/\text{mL}$ ) to serum prevented the formation of a truncated PA<sub>20</sub> and resulted in a PA<sub>20</sub>  
163 fragment that was more similar in size to that produced by furin digestion (Figure 5). In  
164 contrast, no inhibition was seen with lower concentrations of GEMSA and for all  
165 concentrations of carboxypeptidase inhibitor (PTI) from potato-tuber extract.

166

## 167 **DISCUSSION**

168

169 *B. anthracis* and the toxins it secrete have an intimate association with the circulation and  
170 serum over the course of infection. Our studies confirm earlier reports that both human and  
171 animal sera contain a furin-like enzyme, which digests PA to produce PA<sub>63</sub> and PA<sub>20</sub>  
172 fragments (13-15). In our own studies this activity was associated with protection against  
173 lethal toxin in vitro (15). We now extend these findings to demonstrate that human serum  
174 contains a carboxypeptidase, which further processes the PA<sub>20</sub> fragment by removing the C-  
175 terminal basic amino acid residues, resulting in a truncated PA<sub>20</sub> fragment. These findings  
176 contrast with the current model of anthrax toxin, which suggests that processing of PA  
177 occurs only at the cell surface and provide additional evidence for the complexity of anthrax  
178 toxin mechanisms of action. However, we note that serum and cell surface PA processing  
179 are not mutually exclusive events.

180

181 PA<sub>20</sub> has been detected in the blood of *B. anthracis* infected animals though its contribution  
182 to anthrax pathogenesis is unknown (17). Nonetheless, several lines of evidence suggest may  
183 be play an active role in infection. For example, PA<sub>20</sub> contains, a PA<sub>14</sub> domain that is  
184 conserved among bacterial toxins and appears to play a role in cell binding (18).



185 Hammamieh et. al., reported that exposure of human peripheral blood mononuclear cells to  
186 PA<sub>20</sub> induced a variety of genes related to the inflammatory, cell migration and triggered  
187 apoptosis in these cells (17). Furthermore, PA<sub>20</sub> has been reported to bind Lethal Factor  
188 (19). Although circumstantial these findings are consistent with a role for PA<sub>20</sub> in the  
189 pathogenesis of anthrax.

190

191 Serum is known to contain 2 carboxypeptidases (CP), CP-N and CPB<sub>2</sub> (also known as CPU,  
192 plasma carboxypeptidase B and thrombin-activatable fibrinolysis inhibitor). Both  
193 carboxypeptidases cleave carboxy-terminal arginine and lysine residues from  
194 peptides/proteins and have been implicated in regulating inflammation through their  
195 actions on serum protein cascades, like the complement, anaphylatoxins, and kinins (20). As  
196 members of the carboxypeptidase family, both CP-N and CPB<sub>2</sub> contain a zinc-binding site that  
197 makes them susceptible to inhibition by metal chelators. CP-N is constitutively produced by  
198 the liver with serum concentrations on the order of 30 µg/ml (21). In contrast, CPB<sub>2</sub> must  
199 be activated by fibrin and once activated down-regulates fibrinolysis by removing terminal  
200 lysines from fibrin and is present in serum concentrations on the order of 4 - 15.0 µg/ml (22,  
201 23). Elevated levels of CPB<sub>2</sub> have been found in both animal models of bacterial sepsis and in  
202 septic patients and have been hypothesized to play a role in the hypercoagulability  
203 associated with sepsis (24-26). Interestingly, both carboxypeptidases inactivate  
204 complement anaphylatoxins (27, 28). Furthermore, both C3 and C5 have been implicated in  
205 the host response to anthrax (29, 30). Thus PA<sub>20</sub> may possibly alter anthrax pathogenesis  
206 by interfering with anaphylatoxin inactivation during anthrax-associated sepsis.

207

208 It is interesting that CP-N is more susceptible to inhibition by GEMSA, while CPB<sub>2</sub> is more  
209 susceptible to inhibition by potato carboxypeptidase inhibitor (31). Thus, our findings are  
210 consistent with the hypothesis that *in vitro*, CP-N is primarily responsible for the observed  
211 truncation of PA<sub>20</sub>. Nonetheless, the precise carboxypeptidase responsible for the truncation  
212 of PA<sub>20</sub> *in vivo* (including during the sepsis of anthrax) is not known and it is likely that there  
213 is redundancy to the process. Of note, macrophages also express a membrane-associated  
214 carboxypeptidase (CP-M) that cleaves C-terminal lysines and arginine residues from  
215 proteins (32). It is, therefore, likely that a similar processing occurs at the surface of target  
216 cells.

217

218 In summary, we demonstrate that serum processing of PA is a 2-step process that involves a  
219 furin-like digestion of the PA<sub>83</sub> component followed by truncation of the PA<sub>20</sub> fragment by  
220 serum carboxypeptidases. The significance of these 2 serum-associated activities remains  
221 to be defined. Based on earlier studies that associate furin-like digestion with protection,  
222 we believe that this activity may in fact contribute to the host response to anthrax. This  
223 would be consistent with the close association of *B. anthracis* to the circulatory system. We  
224 also suggest that it is possible that the variation in these serum proteolytic activities  
225 contributes to differences in individual susceptibility to anthrax. Additional study looking  
226 and gain and loss of function in the context of experimental infection may help further  
227 delineate the importance of these processes.

228

## 229 **MATERIALS AND METHODS**

230

231 **PA.** Recombinant PA<sub>83</sub> (rPA) and its amino acid sequence were obtained from Wadsworth  
232 laboratories, New York State Department of Health (Albany, NY).

233  
234 **Sera.** Serum from lab volunteers was obtained and stored at -80°C with approval from the  
235 Committee of Clinical Investigations at Albert Einstein College of Medicine. In some  
236 experiments, pooled sera, processed to retain complement activity (Sigma, St Louis, MO) was  
237 used. These commercial sera produced comparable results to those obtained with sera from  
238 human volunteers.

239  
240 **Antibodies and peptides.** A library of 6 murine monoclonal antibodies (7.5G, 16A12, 10F4,  
241 19D9, 20G7 and 2H9) that were previously generated and characterized was used to both  
242 define the digestion site and as detection reagents for immunoblot studies (33). Binding sites  
243 for these antibodies are provided in supplemental table 2. A previously synthesized library  
244 of overlapping peptides, which represents the PA sequence, was used for inhibition studies  
245 (16).

246 **Proteolytic Digestion and Fragment Detection.** Proteolytic digestion studies were  
247 performed as previously described (15). Briefly, rPA (2.5 µg) was incubated with 25 µl of  
248 serum, phosphate buffered saline, or furin (0.5 Units, Invitrogen) at 37°C for 30 – 60 minutes.  
249 In some experiments, serum was heat-treated at 56 °C for 30 minutes prior to incubation  
250 with toxin. In other experiments, protease inhibitors (see below) or peptides at a  
251 **concentration of 5 µg/ml** were added to serum prior to incubation with rPA. Digested rPA  
252 was separated by SDS- electrophoresis and transferred to a nitrocellulose membrane.  
253 Membranes were blocked with 5% milk and then incubated with primary antibody. The

254 following MAbs were used to characterize rPA cleavage: 10F4 (IgG1) and 7.5G (IgG2b). All  
255 MAbs were used at a concentration of 0.25 µg/ml. Primary antibody was detected with  
256 horseradish peroxidase-labeled goat isotype-specific antibody at a dilution of 1:25,000.  
257 Proteins were visualized by development with the ECL chemiluminescence kit (Pierce,  
258 Rockford, IL).

259

## 260 **Inhibition studies**

261

262 *Peptides.* Serum (24 µl) was incubated with individual biotinylated peptides, peptide  
263 mixtures or PBS for 2 hours at room temperature. These peptides were chosen from a library  
264 of peptides representing the entire length of rPA and were synthesized as 15-mer,  
265 overlapping by 10 residues (16). This serum peptide mixture was then incubated with 1.5  
266 µg of rPA for 30 min at 37° C and the resulting mixture subjected to separation by SDS page  
267 and detection by western blot

268

269 *mAbs:* PA (1.5 µg) was incubated with one of several PA-specific mAbs (2µg) (33) for 10  
270 minutes at room temperature. This mixture was then added to 24 µl of serum, incubated at  
271 37 °C for 20 minutes and then subjected to SDS electrophoresis and immunoblotting.

272

273 *Protease inhibitors.* A volume of 10 µl of sera was pre-incubated with 1 of 9 protease  
274 inhibitors included in a commercially available protease inhibitor set (Roche) for 30 minutes  
275 at 30° C. Individual inhibitors including (antipain, bestatin, chymostatin, E-64,  
276 phosphoramidon, pepabloc sc and aprotinin), each of which were reconstituted as per

277 manufacturer's instructions. Following this incubation 1.5 µg of rPA was added to the  
278 mixture and incubated at 37° C for 1 h. Specific inhibition of furin activity was accomplished  
279 using Furin inhibitor I (Caymen Chemicals) and Furin inhibitor II (Sigma). These compounds  
280 are selective competitive inhibitors of the proprotein convertases, including furin. Serum  
281 (12 µl) was incubated with furin inhibitors (at room temperature for 10 minutes and after  
282 which rPA (1.5 µg) was added and the entire mixture incubated for an additional 1 h at 37°C.

283  
284 *Carboxypeptidase inhibition.* For these experiments sera was pre-treated with a variety of  
285 inhibitors for 30 minutes prior to incubation with rPA. These inhibitors included:  
286 guanidinoethylmercaptosuccinic acid (GEMSA, Santa Cruz Biotechnology), or  
287 carboxypeptidase inhibitor from potato tuber extract (Sigma). The serum PA digest mixture  
288 was separated by electrophoresis. PA<sub>63</sub>-like and truncated PA<sub>20</sub> fragments were then  
289 detected with the antibodies 10F4 and 19D2 respectively.

290  
291 **Mass spectrometry (MS).** To isolate the truncated PA<sub>20</sub> molecule, serum-digested rPA was  
292 incubated overnight at 4 °C with 200 µl of protein G resin in binding buffer (20 mM Tris, 150  
293 mM NaCl, pH 7.4) together with the 50 µg of the mAb 19D2. The resultant slurry was  
294 centrifuged for 2.5 min at 2,500 G and the resin washed 5 times with binding buffer (Pierce).  
295 Following elution the protein was separated in a non-denaturing gel and electro-eluted for  
296 further analysis.

297  
298 Mass spectrometric measurements (MS) and liquid chromatographic (LC) separations were  
299 obtained on the LTQ linear ion trap mass spectrometer (Thermo Scientific, San Jose, CA), the

300 Rapid Separation LC 3000 (Dionex Corporation, Sunnyvale, CA) for tryptic peptides and the  
301 HP 1100 series for intact protein separation. For intact protein molecular weight  
302 measurements of the electro-eluted protein a C4 Vydac TP column (1 X 50 mm; 300 Å; 50  
303 µL/min) was used. After desalting at 1% acetonitrile in 0.1% aqueous formic acid (FA) for 2  
304 min the protein was eluted after increasing to 55% acetonitrile in 0.1% aqueous FA. The  
305 mass range from 600 to 1800  $m/z$  was acquired on the LTQ and the raw data was  
306 deconvoluted using MagTran (34) or ProMass (ThermoFisher Scientific). Another aliquot  
307 of the electro-eluted protein was separated on a 1D SDS gel and selected molecular weight  
308 bands were excised for in-gel tryptic digestion as described (35). After sample injection and  
309 LC peptide separation (using an acetonitrile gradient), the top ten most abundant ions  
310 obtained from the survey scan (300 to 1600  $m/z$ ) were selected for fragmentation (MS/MS).  
311 Normalized collision energy of 35% and a 2  $m/z$  isolation width were used for MS/MS. The  
312 MS/MS data were converted to a text file for peptide/protein identification using Mascot  
313 (Matrix Science Inc.).

314  
315 **Carboxypeptidase-mediated digestion of PA.** To determine whether, carboxypeptidase  
316 digestion of furin treated rPA could produce a fragment similar in size to that seen with  
317 serum digestion of rPA, experiments were done with carboxypeptidase B (CPB) (Sigma). For  
318 these experiments, rPA was treated with furin for 10 minutes at 30 °C and the mixture was  
319 incubated with CPB at different concentrations at 37° C. Proteins were separated by SDS  
320 PAGE and detected by immunoblotting as described above.

321

322

323

324

325

326

327 **ACKNOWLEDGMENTS**

328 This work was supported, in whole or in part, by National Institutes of Health Grants  
329 AI33774-11, HL59842-07, AI33142-11, and AI52733-02 (to A. C.). This work was also  
330 supported by the Northeastern Biodefense Center under Grant U54-AI057158-Lipkin and  
331 the NIH-funded Shared instrumentation grant (1S10RR019352) for the LTQ LC-MS/MS  
332 system.

333

334

335

336

337 **CONFLICTS OF INTEREST**

338 The authors declare that they have no conflicts of interest with the contents of this article.

339



340

341 **References**

- 342 1. **Pezard C, Berche P, Mock M.** 1991. Contribution of individual toxin components to  
343 virulence of *Bacillus anthracis*. *Infect Immun* **59**:3472-3477.
- 344 2. **Shiryayev SA, Remacle AG, Ratnikov BI, Nelson NA, Savinov AY, Wei G, Bottini M,**  
345 **Rega MF, Parent A, Desjardins R, Fugere M, Day R, Sabet M, Pellecchia M,**  
346 **Liddington RC, Smith JW, Mustelin T, Guiney DG, Lebl M, Strongin AY.** 2007.  
347 Targeting host cell furin proprotein convertases as a therapeutic strategy against  
348 bacterial toxins and viral pathogens. *J Biol Chem* **282**:20847-20853.
- 349 3. **Albrecht MT, Li H, Williamson ED, LeButt CS, Flick-Smith HC, Quinn CP, Westra**  
350 **H, Galloway D, Mateczun A, Goldman S, Groen H, Baillie LW.** 2007. Human  
351 monoclonal antibodies against anthrax lethal factor and protective antigen act  
352 independently to protect against *Bacillus anthracis* infection and enhance  
353 endogenous immunity to anthrax. *Infect Immun* **75**:5425-5433.
- 354 4. **Brossier F, Levy M, Landier A, Lafaye P, Mock M.** 2004. Functional analysis of  
355 *Bacillus anthracis* protective antigen by using neutralizing monoclonal antibodies.  
356 *Infect Immun* **72**:6313-6317.
- 357 5. **Anonymous.** 2013. Raxibacumab for anthrax. *Med Lett Drugs Ther* **55**:27-28.
- 358 6. **Moayeri M, Leppla SH, Vrentas C, Pomerantsev AP, Liu S.** 2015. Anthrax  
359 Pathogenesis. *Annu Rev Microbiol* **69**:185-208.
- 360 7. **Boyer AE, Gallegos-Candela M, Quinn CP, Woolfitt AR, Brumlow JO, Isbell K,**  
361 **Hoffmaster AR, Lins RC, Barr JR.** 2015. High-sensitivity MALDI-TOF MS  
362 quantification of anthrax lethal toxin for diagnostics and evaluation of medical  
363 countermeasures. *Anal Bioanal Chem* **407**:2847-2858.
- 364 8. **Terwilliger A, Swick MC, Pflughoeft KJ, Pomerantsev A, Lyons CR, Koehler TM,**  
365 **Maresso A.** 2015. *Bacillus anthracis* Overcomes an Amino Acid Auxotrophy by  
366 Cleaving Host Serum Proteins. *J Bacteriol* **197**:2400-2411.
- 367 9. **Weiner ZP, Ernst SM, Boyer AE, Gallegos-Candela M, Barr JR, Glomski IJ.** 2014.  
368 Circulating lethal toxin decreases the ability of neutrophils to respond to *Bacillus*  
369 *anthracis*. *Cell Microbiol* **16**:504-518.
- 370 10. **Rivera J, Cordero RJ, Nakouzi AS, Frases S, Nicola A, Casadevall A.** 2010. *Bacillus*  
371 *anthracis* produces membrane-derived vesicles containing biologically active toxins.  
372 *Proc Natl Acad Sci U S A* **107**:19002-19007.
- 373 11. **Wolf JM, Rivera J, Casadevall A.** 2012. Serum albumin disrupts *Cryptococcus*  
374 *neoformans* and *Bacillus anthracis* extracellular vesicles. *Cell Microbiol* **14**:762-773.
- 375 12. **Panchal RG, Halverson KM, Ribot W, Lane D, Kenny T, Abshire TG, Ezzell JW,**  
376 **Hoover TA, Powell B, Little S, Kasianowicz JJ, Bavari S.** 2005. Purified *Bacillus*  
377 *anthracis* lethal toxin complex formed in vitro and during infection exhibits  
378 functional and biological activity. *J Biol Chem* **280**:10834-10839.
- 379 13. **Ezzell JW, Jr., Abshire TG.** 1992. Serum protease cleavage of *Bacillus anthracis*  
380 protective antigen. *J Gen Microbiol* **138**:543-549.
- 381 14. **Moayeri M, Wiggins JF, Leppla SH.** 2007. Anthrax protective antigen cleavage and  
382 clearance from the blood of mice and rats. *Infect Immun* **75**:5175-5184.

- 383 15. **Goldman DL, Zeng W, Rivera J, Nakouzzi A, Casadevall A.** 2008. Human serum  
384 contains a protease that protects against cytotoxic activity of *Bacillus anthracis*  
385 lethal toxin in vitro. *Clin Vaccine Immunol* **15**:970-973.
- 386 16. **Abboud N, De Jesus M, Nakouzi A, Cordero RJ, Pujato M, Fiser A, Rivera J,**  
387 **Casadevall A.** 2009. Identification of linear epitopes in *Bacillus anthracis* protective  
388 antigen bound by neutralizing antibodies. *The Journal of biological chemistry*  
389 **284**:25077-25086.
- 390 17. **Hammamieh R, Ribot WJ, Abshire TG, Jett M, Ezzell J.** 2008. Activity of the  
391 *Bacillus anthracis* 20 kDa protective antigen component. *BMC Infect Dis* **8**:124.
- 392 18. **Rigden DJ, Galperin MY.** 2004. The DxDxDG motif for calcium binding: multiple  
393 structural contexts and implications for evolution. *J Mol Biol* **343**:971-984.
- 394 19. **Chvyrkova I, Zhang XC, Terzyan S.** 2007. Lethal factor of anthrax toxin binds  
395 monomeric form of protective antigen. *Biochem Biophys Res Commun* **360**:690-  
396 695.
- 397 20. **Djukanovic R, Wilson SJ, Kraft M, Jarjour NN, Steel M, Chung KF, Bao W, Fowler-**  
398 **Taylor A, Matthews J, Busse WW, Holgate ST, Fahy JV.** 2004. Effects of treatment  
399 with anti-immunoglobulin E antibody omalizumab on airway inflammation in  
400 allergic asthma. *Am J Respir Crit Care Med* **170**:583-593.
- 401 21. **Skidgel RA, Erdos EG.** 2007. Structure and function of human plasma  
402 carboxypeptidase N, the anaphylatoxin inactivator. *Int Immunopharmacol* **7**:1888-  
403 1899.
- 404 22. **Mosnier LO, von dem Borne PA, Meijers JC, Bouma BN.** 1998. Plasma TAFI levels  
405 influence the clot lysis time in healthy individuals in the presence of an intact  
406 intrinsic pathway of coagulation. *Thromb Haemost* **80**:829-835.
- 407 23. **Bajzar L, Nesheim ME, Tracy PB.** 1996. The profibrinolytic effect of activated  
408 protein C in clots formed from plasma is TAFI-dependent. *Blood* **88**:2093-2100.
- 409 24. **Binette TM, Taylor FB, Jr., Peer G, Bajzar L.** 2007. Thrombin-thrombomodulin  
410 connects coagulation and fibrinolysis: more than an in vitro phenomenon. *Blood*  
411 **110**:3168-3175.
- 412 25. **Kim PY, Kim PY, Hoogendorn H, Giles AR, Nesheim ME.** 2008. Activated  
413 thrombin-activatable fibrinolysis inhibitor is generated in vivo at levels that can  
414 substantially affect fibrinolysis in chimpanzees in response to thrombin generation.  
415 *J Thromb Haemost* **6**:1600-1602.
- 416 26. **Park R, Song J, An SS.** 2010. Elevated levels of activated and inactivated thrombin-  
417 activatable fibrinolysis inhibitor in patients with sepsis. *Korean J Hematol* **45**:264-  
418 268.
- 419 27. **Bokisch VA, Muller-Eberhard HJ.** 1970. Anaphylatoxin inactivator of human  
420 plasma: its isolation and characterization as a carboxypeptidase. *J Clin Invest*  
421 **49**:2427-2436.
- 422 28. **Campbell WD, Lazoura E, Okada N, Okada H.** 2002. Inactivation of C3a and C5a  
423 octapeptides by carboxypeptidase R and carboxypeptidase N. *Microbiol Immunol*  
424 **46**:131-134.
- 425 29. **Premanandan C, Storozuk CA, Clay CD, Lairmore MD, Schlesinger LS, Phipps AJ.**  
426 2009. Complement protein C3 binding to *Bacillus anthracis* spores enhances  
427 phagocytosis by human macrophages. *Microb Pathog* **46**:306-314.

- 428 30. **Harvill ET, Lee G, Grippe VK, Merkel TJ.** 2005. Complement depletion renders  
429 C57BL/6 mice sensitive to the Bacillus anthracis Sterne strain. *Infect Immun*  
430 **73**:4420-4422.
- 431 31. **Matthews KW, Mueller-Ortiz SL, Wetsel RA.** 2004. Carboxypeptidase N: a  
432 pleiotropic regulator of inflammation. *Mol Immunol* **40**:785-793.
- 433 32. **Rehli M, Krause SW, Kreutz M, Andreesen R.** 1995. Carboxypeptidase M is  
434 identical to the MAX.1 antigen and its expression is associated with monocyte to  
435 macrophage differentiation. *J Biol Chem* **270**:15644-15649.
- 436 33. **Rivera J, Nakouzi A, Abboud N, Revskaya E, Goldman D, Collier RJ, Dadachova**  
437 **E, Casadevall A.** 2006. A monoclonal antibody to Bacillus anthracis protective  
438 antigen defines a neutralizing epitope in domain 1. *Infect Immun* **74**:4149-4156.
- 439 34. **Zhang Z, Marshall AG.** 1998. A universal algorithm for fast and automated charge  
440 state deconvolution of electrospray mass-to-charge ratio spectra. *J Am Soc Mass*  
441 *Spectrom* **9**:225-233.
- 442 35. **Xiao Y, Pollack D, Andrusier M, Levy A, Callaway M, Nieves E, Reddi P, Vigodner**  
443 **M.** 2016. Identification of cell-specific targets of sumoylation during mouse  
444 spermatogenesis. *Reproduction* **151**:149-166.
- 445

446

447

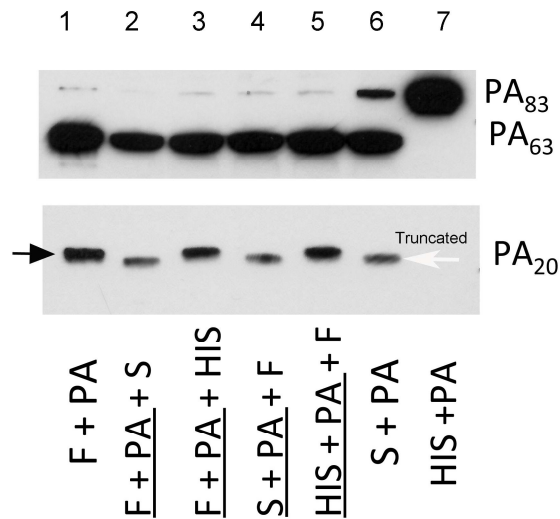

Figure 1. **Serum mediated digestion of rPA<sub>83</sub> produces a truncated PA<sub>20</sub> fragment when compared with furin-mediated digestion.** Shown are the digestion fragments of PA<sub>83</sub> when incubated with either furin (F, lane 1), serum (S, lane 6) or heat-inactivated serum (HIS, lane 7). Treatment of PA<sub>83</sub> with serum either after or prior to furin digestion (lanes 2 and 4 respectively) produced a truncated PA<sub>20</sub> fragment indicating that serum digestion of PA<sub>20</sub> occurs with furin-digested PA. In contrast, incubation of furin-treated PA<sub>83</sub> with heat-inactivated serum (lanes 3 and 5) did not produce a truncated PA<sub>20</sub> fragment. For the purpose of this assay, mAb 10F4 (which recognizes domain 2-4) was used to detect the PA<sub>63</sub> fragment, while mAb 19D9 (which recognizes domain 1) was used to detect both the normal and truncated PA<sub>20</sub> fragments. Black arrow points to the normal PA<sub>20</sub> fragment while the white arrow points to the truncated PA<sub>20</sub>.

448

449

450

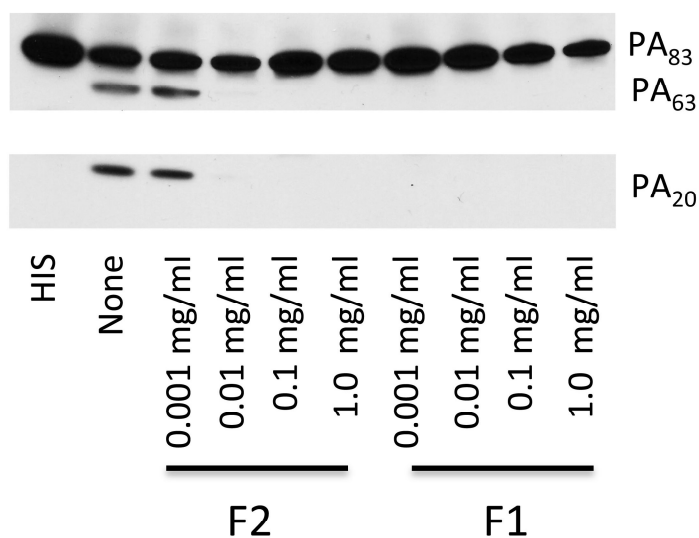

**Figure 2. Furin inhibitors I and II prevent serum-mediated digestion of rPA<sub>83</sub>.** Heat-inactivated serum (HIS) had no effect on rPA. In the absence of inhibitor (none) PA<sub>83</sub>, PA<sub>63</sub> and PA<sub>20</sub>-like fragments are present. Both Furin Inhibitors I and II (F<sub>1</sub> and F<sub>2</sub>) prevented serum digestion of PA<sub>83</sub>. PA<sub>83</sub> was incubated for serum for 30 minutes.

451

452

453

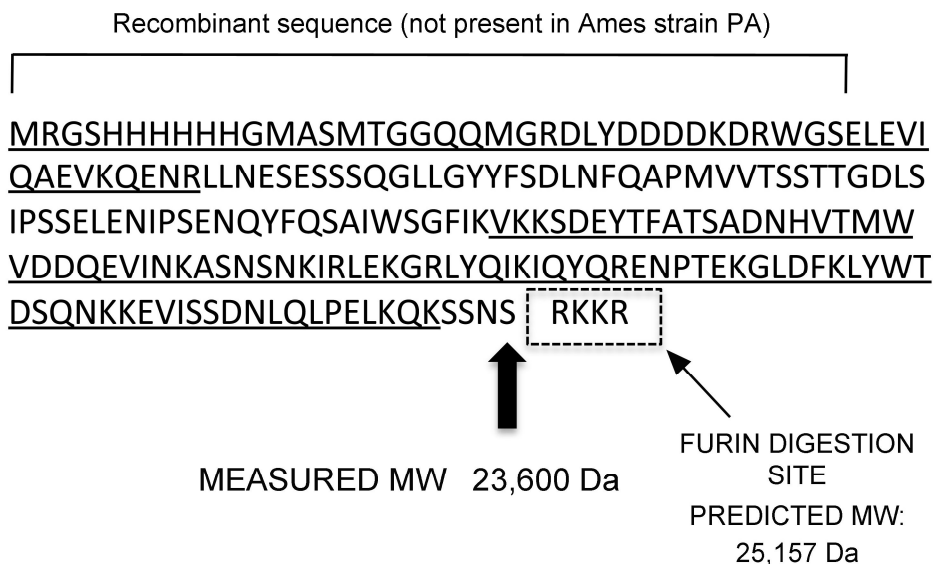

**Figure 3. Mass spectrometry of serum truncated PA20 fragment.**

The intact mass of the isolated fragment was 23,600 Da. The predicted size of the fragment to SNSS is 23,588 Da, (thick arrow) a difference of 15 Da or 0.06 % ,when compared with the measured mass. Underlined sequences were detected by MS analysis. The box represents the consensus recognition site for furin.

454

455

456

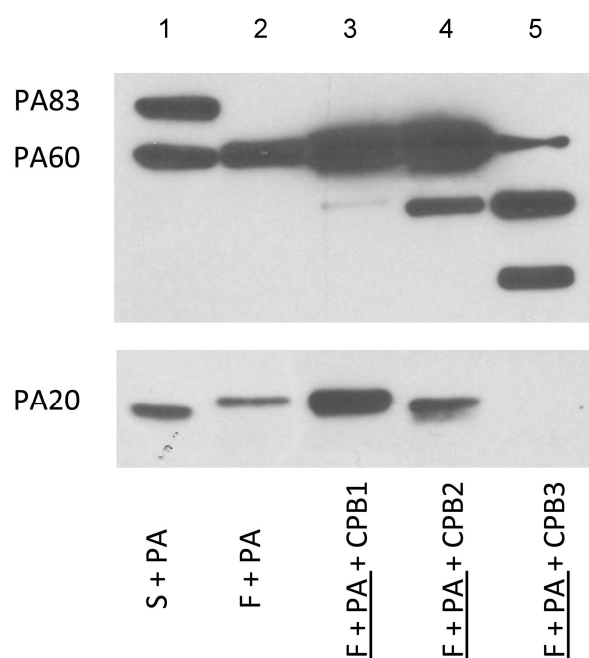

**Figure 4. Carboxypeptidase B (CPB) treatment of furin digested PA produces a truncated PA<sub>20</sub> fragment.** Treatment of furin digested rPA83 with CPB from pig pancrease resulted in a dose-related truncation of the PA<sub>20</sub> fragment. This was most apparent for CPB2 (25  $\mu$ g/ml) as opposed to lower concentrations of CPB1 (2.5  $\mu$ g/ml). Incubation with higher concentrations CPB3 (250  $\mu$ g/ml) resulted in complete loss of PA<sub>20</sub> reactivity and the appearance of multiple digestion fragments. Underline indicated pre-incubation.

457

458

459

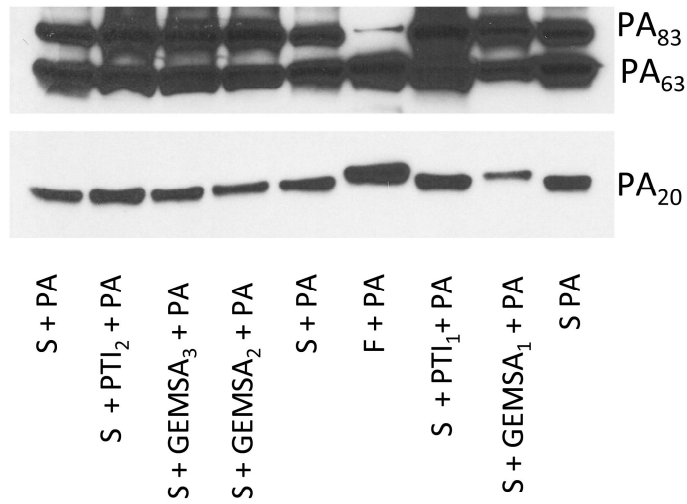

**Figure 5. GEMSA but not caboxypeptidase inhibitor from potato-tuber extract (PTI) prevents formation of truncated PA<sub>20</sub>.** In the presence of high concentrations of GEMSA (GEMSA<sub>1</sub>, 500 µg/ml), serum treatment of PA<sub>83</sub> produced a PA<sub>63</sub> fragment and a non-truncated PA<sub>20</sub> fragment. In contrast, PTI at concentrations as high 1.25 mg/ml (PTI<sub>1</sub>) failed to inhibit serum truncation of PA<sub>20</sub>. Lower concentrations of GEMSA (50 and 5 µg/ml; GEMSA<sub>2</sub> and GEMSA<sub>3</sub>) and PTI<sub>2</sub> (125 µg/ml) had no effect on serum-truncation of PA<sub>20</sub>.

460

461



**Supplemental Table 1.**

| Start-End  | Observed | Mr (expt) | Mr (calc) | Delta | Miss | Sequence                          | Modification                       | Ions Score |
|------------|----------|-----------|-----------|-------|------|-----------------------------------|------------------------------------|------------|
| 1 to 23    | 856.3    | 2566.0    | 2565.1    | 0.9   | 1    | MRGSHHHHHHGMASMTGGQQMGR           | Deamidated (NQ)                    | 55         |
| 1 to 23    | 861.5    | 2581.4    | 2581.1    | 0.3   | 1    | MRGSHHHHHHGMASMTGGQQMGR           | Deamidated (NQ); Oxidation (M)     | 50         |
| 1 to 23    | 866.2    | 2595.6    | 2596.1    | -0.5  | 1    | MRGSHHHHHHGMASMTGGQQMGR           | 2 Oxidation (M)                    | 43         |
| 1 to 23    | 866.5    | 2596.4    | 2597.1    | -0.6  | 1    | MRGSHHHHHHGMASMTGGQQMGR           | Deamidated (NQ); 2 Oxidation (M)   | 36         |
| 1 to 23    | 867.0    | 2597.9    | 2598.1    | -0.1  | 1    | MRGSHHHHHHGMASMTGGQQMGR           | 2 Deamidated (NQ); 2 Oxidation (M) | 36         |
| 3 to 23    | 760.3    | 2278.0    | 2277.9    | 0.0   | 0    | GSHHHHHHGMASMTGGQQMGR             | Deamidated (NQ)                    | 57         |
| 3 to 23    | 1140.3   | 2278.6    | 2278.9    | -0.4  | 0    | GSHHHHHHGMASMTGGQQMGR             | 2 Deamidated (NQ)                  | 36         |
| 3 to 23    | 765.9    | 2294.7    | 2293.9    | 0.8   | 0    | GSHHHHHHGMASMTGGQQMGR             | Deamidated (NQ); Oxidation (M)     | 46         |
| 3 to 23    | 765.8    | 2294.4    | 2294.9    | -0.5  | 0    | GSHHHHHHGMASMTGGQQMGR             | 2 Deamidated (NQ); Oxidation (M)   | 42         |
| 24 to 50   | 1633.8   | 3265.5    | 3266.5    | -1.0  | 3    | DLYDDDDKDRWGSELEVIQAEVKQENR       | 2 Deamidated (NQ)                  | 36         |
| 24 to 50   | 1089.9   | 3266.8    | 3267.5    | -0.6  | 3    | DLYDDDDKDRWGSELEVIQAEVKQENR       | 3 Deamidated (NQ)                  | 42         |
| 34 to 46   | 744.9    | 1487.8    | 1487.8    | 0.0   | 0    | WGSELEVIQAEVK                     | Deamidated (NQ)                    | 82         |
| 114 to 142 | 1125.4   | 3373.2    | 3372.5    | 0.6   | 2    | VKKSDEYTFATSADNHVTMWVDDQEVINK     | 3 Deamidated (NQ)                  | 58         |
| 116 to 142 | 1049.1   | 3144.3    | 3144.4    | 0.0   | 1    | KSDEYTFATSADNHVTMWVDDQEVINK       | 2 Deamidated (NQ)                  | 58         |
| 116 to 142 | 1573.7   | 3145.4    | 3145.4    | 0.0   | 1    | KSDEYTFATSADNHVTMWVDDQEVINK       | 3 Deamidated (NQ)                  | 47         |
| 116 to 142 | 1054.3   | 3159.8    | 3160.4    | -0.6  | 1    | KSDEYTFATSADNHVTMWVDDQEVINK       | 2 Deamidated (NQ); Oxidation (M)   | 55         |
| 116 to 148 | 1250.2   | 3747.6    | 3746.7    | 0.9   | 2    | KSDEYTFATSADNHVTMWVDDQEVINKASNSNK | 3 Deamidated (NQ)                  | 132        |
| 117 to 142 | 1509.4   | 3016.9    | 3016.3    | 0.6   | 0    | SDEYTFATSADNHVTMWVDDQEVINK        | 2 Deamidated (NQ)                  | 73         |
| 117 to 142 | 1006.5   | 3016.4    | 3017.3    | -0.9  | 0    | SDEYTFATSADNHVTMWVDDQEVINK        | 3 Deamidated (NQ)                  | 68         |
| 117 to 148 | 1207.9   | 3620.8    | 3618.6    | 2.3   | 1    | SDEYTFATSADNHVTMWVDDQEVINK        | 3 Deamidated (NQ)                  | 90         |
| 143 to 153 | 631.7    | 1261.3    | 1259.7    | 1.6   | 2    | ASNSNKIRLEK                       | Deamidated (NQ)                    | 38         |
| 149 to 153 | 330.2    | 658.3     | 657.4     | 0.9   | 1    | IRLEK                             |                                    | 23         |
| 154 to 160 | 440.1    | 878.2     | 877.5     | 0.7   | 1    | GRLYQIK                           | Deamidated (NQ)                    | 23         |
| 156 to 160 | 333.2    | 664.3     | 663.4     | 0.9   | 0    | LYQIK                             |                                    | 27         |
| 161 to 171 | 703.7    | 1405.4    | 1405.7    | -0.3  | 1    | IQYQRENPTTEK                      | Deamidated (NQ)                    | 53         |
| 161 to 176 | 984.3    | 1966.6    | 1966.0    | 0.6   | 2    | IQYQRENPTTEKGLDFK                 | Deamidated (NQ)                    | 55         |
| 161 to 176 | 656.5    | 1966.5    | 1967.0    | -0.5  | 2    | IQYQRENPTTEKGLDFK                 | 2 Deamidated (NQ)                  | 41         |
| 161 to 186 | 1078.4   | 3232.2    | 3231.6    | 0.6   | 4    | IQYQRENPTTEKGLDFKLYWTDQSNKK       | 3 Deamidated (NQ)                  | 38         |
| 166 to 176 | 639.8    | 1277.6    | 1277.6    | 0.0   | 1    | ENPTEKGLDFK                       | Deamidated (NQ)                    | 30         |
| 172 to 186 | 922.9    | 1843.8    | 1842.9    | 0.9   | 2    | GLDFKLYWTDQSNKK                   | Deamidated (NQ)                    | 89         |
| 177 to 186 | 642.2    | 1282.3    | 1282.6    | -0.3  | 1    | LYWTDQSNKK                        | Deamidated (NQ)                    | 46         |
| 177 to 200 | 951.0    | 2849.8    | 2850.4    | -0.6  | 2    | LYWTDQSNKKEVISSDNLQLPELK          | 3 Deamidated (NQ)                  | 43         |
| 177 to 200 | 1426.5   | 2851.1    | 2850.4    | 0.7   | 2    | LYWTDQSNKKEVISSDNLQLPELK          | 3 Deamidated (NQ)                  | 63         |
| 187 to 200 | 793.8    | 1585.5    | 1584.8    | 0.7   | 0    | EVISSDNLQLPELK                    | Deamidated (NQ)                    | 32         |
| 187 to 202 | 921.5    | 1841.0    | 1841.0    | 0.0   | 1    | EVISSDNLQLPELKQK                  | Deamidated (NQ)                    | 98         |
| 187 to 202 | 921.9    | 1841.8    | 1842.0    | -0.2  | 1    | EVISSDNLQLPELKQK                  | 2 Deamidated (NQ)                  | 97         |

Start-End - Amino acid residue numbers  
Observed - experimental precursor *m/z*  
Mr (expt) - experimental peptide mass  
Mr (calc) - predicted peptide mass  
Delta - difference in peptide mass between experimental and predicted  
Miss - number of miss cleavages  
Sequence- peptide amino acid sequence  
Modification - modification (s) present in peptide  
Ions Score - the calculated probability, P, that the observed match between the experimental data and the database sequence is a random event. The reported score is -10Log(P) (obtained from Matrix Science web site)

462  
463

464 **Supplemental Table 2.**

465

466

467 \*

| <b>Antibody</b> | <b>Isotype</b>    | <b>PA Fragment</b> | <b>Specificity</b> |
|-----------------|-------------------|--------------------|--------------------|
| 7.5g            | IgG <sub>2b</sub> | PA <sub>20</sub>   | Domain 1           |
| 10F4            | IgG <sub>1</sub>  | PA <sub>63</sub>   | Domain 4           |
| 19D9            | IgG <sub>1</sub>  | PA <sub>20</sub>   | Domain 1*          |
| 20G7            | IgM               | PA <sub>20</sub>   | Domain 1*          |
| 2H9             | IgG <sub>1</sub>  | PA <sub>63</sub>   | Domains 2-4        |

468 These antibodies compete with each other to bind Domain 1.

469

470

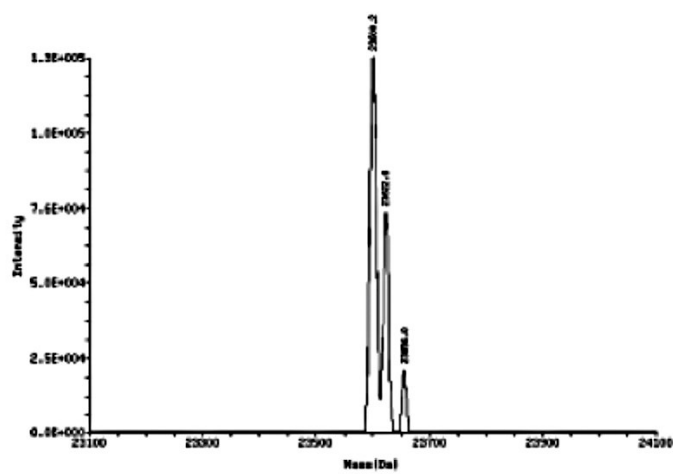

Supplemental Figure 1. Deconvoluted experimental mass for the truncated PA20 fragment obtained from the intact protein LC-MS measurement.

471

472

473

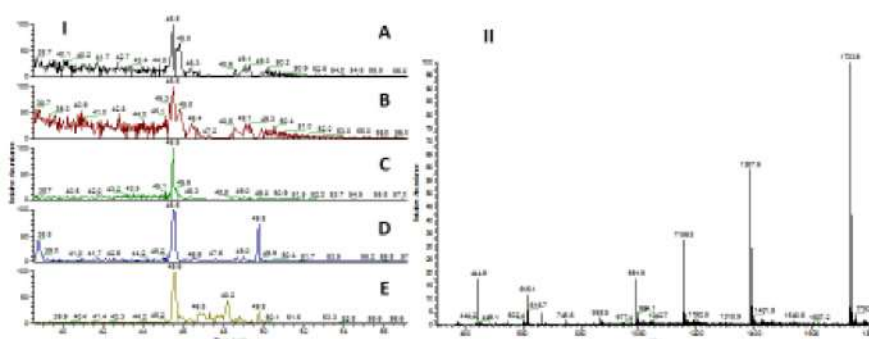

**Supplemental Figure 2.** Extracted ion chromatogram (I) of the +4, +5, +6 +7, +8 charge states (A-E) of the peptide rPA83 following trypsin digestion- LLNESESSQGLLYYFSDLNLFQAPMVVTSSTTGDLSPSELNIPSE NQYFQSAIWSGFIK. The mass spectra for the 45.6 minute retention time peak corresponding to this peptide is shown(II).

474

475
